# Supplementary material for: Estimating Effects of Sea Level Rise on Benthic Biodiversity and Ecosystem Functioning in a Large Meso-Tidal Coastal Lagoon
Source: MDPI journal article supplement (doi:10.3390/biology12010105), 2023-01-10
Supplement: s1 [file s1]

# SUPPLEMENTARY MATERIAL

for

Estimating effects of sea-level rise on benthic biodiversity and ecosystem functioning in a large meso-tidal coastal lagoon

by

Olivia Dixon, Johanna Gammal, Dana Clark, Joanne Ellis, Conrad A. Pilditch

Supplementary Table S1. Site information. Data were obtained then collated from the research programmes MTM (Ellis et al. 2013 [51]; Site ID I1-I75, sampled during austral summer Dec 2011–Feb 2012) and OTOT (Clark et al. 2018 [52]; Site ID S1-S45, sampled during austral autumn Mar–May 2016). Tidal zone refers to the tidal zones derived from the clustered groups (IT: intertidal, SS: shallow subtidal, DS: deep subtidal), depth is the model grid depth corrected to chart datum (negative values reflect periods of emergence).

| Site ID | NZIM E  | NZIM N  | Tidal zone | Depth | Average current speed | Chl- <i>a</i> | OM  | Mud         | Sand               | Gravel     | Pb        | Zn        | Cu        | TP        | TN        | N         | S        |
|---------|---------|---------|------------|-------|-----------------------|---------------|-----|-------------|--------------------|------------|-----------|-----------|-----------|-----------|-----------|-----------|----------|
|         |         |         |            | m     | m/s                   | µg/kg         | %   | %<br><63 µm | %<br>≥63µm<br><2mm | %<br>≥2 mm | mg/<br>kg | mg/<br>kg | mg/<br>kg | mg/<br>kg | mg/<br>kg | ind./core | no./core |
| I1      | 1862844 | 5850790 | IT         | -0.84 | 0.14                  | 4600          | 1.6 | 3.6         | 96.0               | 0.4        | 1.1       | 8         | 1         | 110       | 380       | 107 ± 18  | 18 ± 2   |
| I2      | 1863039 | 5849578 | IT         | 0.27  | 0.33                  | 6600          | 2.4 | 2.5         | 87.3               | 10.2       | 1.4       | 9         | 1         | 210       | 590       | 236 ± 49  | 16 ± 3   |
| I3      | 1861313 | 5849572 | IT         | -0.87 | 0.12                  | 4600          | 1.9 | 3.9         | 94.5               | 1.7        | 1.0       | 6         | 1         | 110       | 380       | 145 ± 61  | 15 ± 2   |
| I4      | 1860898 | 5848973 | IT         | -1.12 | 0.14                  | 3200          | 2.5 | 5.6         | 94.0               | 0.4        | 1.0       | 6         | 1         | 120       | 350       | 108 ± 39  | 12 ± 2   |
| I5      | 1862374 | 5849061 | IT         | -0.32 | 0.28                  | 2400          | 1.6 | 1.5         | 97.4               | 1.2        | 1.0       | 7         | 1         | 140       | 290       | 256 ± 109 | 15 ± 4   |
| I6      | 1860947 | 5847735 | IT         | -0.68 | 0.17                  | 8600          | 3.8 | 7.3         | 91.9               | 0.7        | 1.3       | 11        | 1         | 180       | 530       | 120 ± 24  | 18 ± 1   |
| I7      | 1860284 | 5846213 | IT         | -0.91 | 0.15                  | 10000         | 3.0 | 10.2        | 88.7               | 1.1        | 1.0       | 11        | 1         | 180       | 640       | 195 ± 45  | 15 ± 2   |
| I8      | 1862990 | 5845258 | DS         | 0.39  | 0.47                  | 5300          | 3.0 | 2.9         | 96.7               | 0.3        | 1.3       | 10        | 1         | 160       | 380       | 46 ± 21   | 6 ± 1    |
| I9      | 1861385 | 5842837 | IT         | -0.71 | 0.09                  | 2200          | 1.0 | 3.6         | 94.9               | 1.5        | 1.4       | 27        | 1         | 78        | 180       | 95 ± 12   | 12 ± 2   |

| Site ID | NZTM E  | NZTM N  | Tidal zone | Depth | Average current speed | Chl- <i>a</i> | OM  | Mud         | Sand               | Gravel     | Pb        | Zn        | Cu        | TP        | TN        | N         | S        |
|---------|---------|---------|------------|-------|-----------------------|---------------|-----|-------------|--------------------|------------|-----------|-----------|-----------|-----------|-----------|-----------|----------|
|         |         |         |            | m     | m/s                   | µg/kg         | %   | %<br><63 µm | %<br>≥63µm<br><2mm | %<br>≥2 mm | mg/<br>kg | mg/<br>kg | mg/<br>kg | mg/<br>kg | mg/<br>kg | ind./core | no./core |
| I10     | 1859160 | 5841668 | IT         | -0.78 | 0.10                  | 1100          | 4.4 | 30.9        | 66.2               | 2.9        | 5.6       | 34        | 3         | 340       | 1000      | 104 ± 79  | 9 ± 1    |
| I11     | 1861019 | 5840122 | IT         | -0.60 | 0.12                  | 4400          | 2.8 | 6.5         | 92.5               | 0.9        | 1.1       | 12        | 1         | 120       | 390       | 152 ± 87  | 12 ± 2   |
| I12     | 1860872 | 5838709 | IT         | -0.55 | 0.23                  | 1900          | 2.0 | 8.9         | 91.0               | 0.1        | 1.9       | 9         | 1         | 120       | 300       | 118 ± 39  | 11 ± 2   |
| I13     | 1859645 | 5838849 | IT         | -0.97 | 0.10                  | 2800          | 3.1 | 14.3        | 85.1               | 0.6        | 3.4       | 22        | 1.5       | 250       | 540       | 34 ± 17   | 8 ± 2    |
| I14     | 1858852 | 5837443 | IT         | -1.05 | 0.08                  | 5600          | 4.5 | 24.7        | 74.3               | 1.0        | 4.6       | 26        | 2.4       | 330       | 830       | 119 ± 49  | 9 ± 2    |
| I15     | 1864615 | 5844595 | IT         | 1.11  | 0.42                  | 1200          | 2.1 | 3.7         | 95.9               | 0.4        | 2.2       | 13        | 1         | 160       | 340       | 160 ± 89  | 17 ± 4   |
| I16     | 1861664 | 5847064 | IT         | 0.46  | 0.27                  | 7000          | 1.8 | 3.3         | 96.1               | 0.7        | 1.5       | 11        | 1         | 180       | 310       | 236 ± 35  | 19 ± 2   |
| I17     | 1866194 | 5839926 | IT         | -0.29 | 0.19                  | 4200          | 2.1 | 3.9         | 94.1               | 2.0        | 1.0       | 8         | 1         | 110       | 370       | 111 ± 49  | 15 ± 3   |
| I18     | 1868133 | 5838623 | IT         | -1.26 | 0.15                  | 210           | 0.9 | 1.3         | 98.5               | 0.2        | 1.1       | 3         | 1         | 53        | 140       | 38 ± 4    | 11 ± 2   |
| I19     | 1865401 | 5839681 | IT         | -0.07 | 0.24                  | 3000          | 2.1 | 4.3         | 95.6               | 0.1        | 1.2       | 7         | 1         | 91        | 310       | 27 ± 7    | 10 ± 2   |
| I20     | 1870400 | 5836995 | IT         | -1.30 | 0.18                  | 1200          | 1.6 | 0.1         | 100                | 0.1        | 1.3       | 10        | 1         | 92        | 340       | 34 ± 4    | 9 ± 0    |
| I21     | 1862901 | 5839911 | IT         | -0.58 | 0.16                  | 5100          | 3.8 | 6.5         | 91.3               | 2.0        | 1.3       | 11        | 1         | 180       | 540       | 98 ± 31   | 15 ± 6   |
| I22     | 1864304 | 5836733 | IT         | -0.51 | 0.19                  | 3300          | 4.2 | 17.5        | 81.6               | 0.9        | 3.5       | 18        | 1.7       | 220       | 700       | 82 ± 16   | 11 ± 3   |
| I23     | 1863958 | 5837013 | IT         | -1.02 | 0.12                  | 7900          | 3.1 | 34.2        | 64.9               | 0.8        | 3.1       | 14        | 1         | 200       | 430       | 81 ± 41   | 11 ± 1   |
| I24     | 1867485 | 5834361 | IT         | -0.17 | 0.22                  | 5600          | 2.6 | 15.7        | 83.5               | 0.8        | 3.1       | 19        | 1         | 200       | 390       | 97 ± 22   | 13 ± 2   |
| I25     | 1867748 | 5834506 | IT         | -0.86 | 0.07                  | 3800          | 0.9 | 1.4         | 97.2               | 1.4        | 1.4       | 6         | 1         | 51        | 180       | 43 ± 17   | 9 ± 1    |

| Site ID | NZTM E  | NZTM N  | Tidal zone | Depth | Average current speed | Chl- <i>a</i> | OM  | Mud         | Sand               | Gravel     | Pb        | Zn        | Cu        | TP        | TN        | N         | S        |
|---------|---------|---------|------------|-------|-----------------------|---------------|-----|-------------|--------------------|------------|-----------|-----------|-----------|-----------|-----------|-----------|----------|
|         |         |         |            | m     | m/s                   | µg/kg         | %   | %<br><63 µm | %<br>≥63µm<br><2mm | %<br>≥2 mm | mg/<br>kg | mg/<br>kg | mg/<br>kg | mg/<br>kg | mg/<br>kg | ind./core | no./core |
| I26     | 1864309 | 5834506 | IT         | -0.81 | 0.13                  | 3600          | 4.0 | 23.3        | 76.5               | 0.1        | 2.7       | 13        | 1.3       | 130       | 590       | 51 ± 21   | 13 ± 2   |
| I27     | 1863615 | 5834467 | IT         | -0.52 | 0.17                  | 7300          | 4.2 | 18.7        | 81.3               | 0.1        | 4.3       | 20        | 2.2       | 180       | 580       | 75 ± 44   | 7 ± 2    |
| I28     | 1862821 | 5834277 | IT         | -0.95 | 0.08                  | 8600          | 3.5 | 22.4        | 77.5               | 0.1        | 2.8       | 14        | 1.3       | 160       | 520       | 329 ± 171 | 3 ± 1    |
| I29     | 1872451 | 5833584 | IT         | -0.59 | 0.12                  | 3900          | 2.7 | 16.2        | 82.6               | 1.2        | 2.5       | 16        | 1.2       | 150       | 690       | 76 ± 2    | 14 ± 2   |
| I30     | 1872580 | 5833532 | IT         | -0.48 | 0.11                  | 4000          | 1.8 | 8.9         | 90.7               | 0.5        | 1.9       | 9         | 1         | 97        | 450       | 90 ± 26   | 14 ± 2   |
| I31     | 1875571 | 5831455 | IT         | -0.84 | 0.16                  | 4800          | 3.2 | 13.0        | 86.1               | 1.0        | 1.9       | 10        | 1         | 120       | 490       | 69 ± 31   | 15 ± 2   |
| I32     | 1875642 | 5830632 | IT         | -0.57 | 0.15                  | 8100          | 2.3 | 7.7         | 91.2               | 1.1        | 2.5       | 12        | 1         | 160       | 490       | 113 ± 20  | 17 ± 1   |
| I33     | 1876347 | 5830239 | IT         | -0.61 | 0.17                  | 7200          | 2.6 | 6.3         | 91.5               | 2.3        | 2.2       | 12        | 1         | 190       | 550       | 112 ± 11  | 14 ± 3   |
| I34     | 1876500 | 5830117 | IT         | -0.36 | 0.15                  | 5400          | 1.8 | 3.2         | 96.2               | 0.7        | 1.9       | 8         | 1         | 130       | 350       | 101 ± 61  | 13 ± 3   |
| I35     | 1873330 | 5831630 | IT         | -1.23 | 0.13                  | 3300          | 1.4 | 3.3         | 96.0               | 0.7        | 1.2       | 5         | 1         | 93        | 290       | 70 ± 15   | 13 ± 2   |
| I36     | 1866432 | 5832044 | IT         | 1.71  | 0.18                  | 4700          | 3.3 | 12.6        | 87.3               | 0.2        | 3.1       | 15        | 1         | 180       | 530       | 145 ± 18  | 18 ± 2   |
| I37     | 1863362 | 5831812 | IT         | -0.93 | 0.12                  | 3300          | 4.5 | 47.5        | 51.0               | 1.5        | 4.5       | 26        | 1.4       | 310       | 760       | 66 ± 43   | 9 ± 2    |
| I38     | 1864247 | 5830677 | IT         | -0.63 | 0.07                  | 4100          | 4.2 | 48.9        | 50.7               | 0.3        | 4.1       | 21        | 1.1       | 260       | 620       | 29 ± 10   | 10 ± 2   |
| I39     | 1865756 | 5831517 | IT         | -0.71 | 0.07                  | 4300          | 2.6 | 15.0        | 84.2               | 0.8        | 2.0       | 12        | 1.6       | 130       | 460       | 64 ± 25   | 14 ± 3   |
| I40     | 1866557 | 5830113 | IT         | -1.32 | 0.02                  | 6100          | 3.8 | 31.5        | 68.4               | 0.2        | 4.0       | 19        | 1.4       | 220       | 650       | 31 ± 2    | 9 ± 5    |
| I41     | 1866954 | 5830644 | IT         | -0.67 | 0.15                  | 5000          | 3.5 | 15.1        | 84.3               | 0.6        | 2.3       | 15        | 1         | 140       | 450       | 66 ± 16   | 15 ± 1   |

| Site ID | NZTM E  | NZTM N  | Tidal zone | Depth | Average current speed | Chl- <i>a</i> | OM   | Mud         | Sand               | Gravel     | Pb        | Zn        | Cu        | TP        | TN        | N         | S        |
|---------|---------|---------|------------|-------|-----------------------|---------------|------|-------------|--------------------|------------|-----------|-----------|-----------|-----------|-----------|-----------|----------|
|         |         |         |            | m     | m/s                   | µg/kg         | %    | %<br><63 µm | %<br>≥63µm<br><2mm | %<br>≥2 mm | mg/<br>kg | mg/<br>kg | mg/<br>kg | mg/<br>kg | mg/<br>kg | ind./core | no./core |
| I42     | 1868018 | 5830518 | SS         | -0.17 | 0.17                  | 5900          | 4.0  | 25.4        | 73.9               | 0.9        | 4.3       | 27        | 1.5       | 280       | 760       | 122 ± 37  | 12 ± 1   |
| I43     | 1868270 | 5833779 | IT         | 0.75  | 0.17                  | 5000          | 1.6  | 4.9         | 94.5               | 0.6        | 2.6       | 14        | 1         | 120       | 310       | 89 ± 18   | 14 ± 2   |
| I44     | 1870057 | 5830629 | IT         | -0.36 | 0.34                  | 5000          | 4.3  | 20.9        | 77.6               | 1.6        | 5.1       | 21        | 1.3       | 220       | 450       | 184 ± 20  | 19 ± 3   |
| I45     | 1879574 | 5828564 | DS         | 0.33  | 0.83                  | 11000         | 1.2  | 1.5         | 97.5               | 1.0        | 1.0       | 6         | 1         | 180       | 320       | 81 ± 21   | 13 ± 2   |
| I46     | 1868460 | 5828617 | IT         | -0.90 | 0.07                  | 4900          | 3.8  | 38.6        | 60.0               | 1.5        | 3.7       | 22        | 1.3       | 240       | 620       | 86 ± 2    | 14 ± 1   |
| I47     | 1867687 | 5827666 | IT         | -2.00 | 0.01                  | 8800          | 4.0  | 29.2        | 60.5               | 10.2       | 3.3       | 18        | 1         | 220       | 660       | 29 ± 12   | 8 ± 1    |
| I48     | 1868434 | 5825385 | IT         | -0.97 | 0.04                  | 11000         | 10.0 | 76.4        | 23.7               | 0.1        | 13.0      | 46        | 6.1       | 580       | 1900      | 148 ± 61  | 4 ± 1    |
| I49     | 1869659 | 5827627 | IT         | -1.01 | 0.07                  | 5600          | 3.0  | 17.3        | 77.2               | 5.6        | 5.4       | 55        | 1.7       | 210       | 680       | 224 ± 89  | 17 ± 3   |
| I50     | 1870076 | 5827281 | IT         | -1.47 | 0.06                  | 9600          | 4.5  | 27.9        | 68.2               | 3.9        | 4.2       | 34        | 2         | 290       | 920       | 122 ± 37  | 13 ± 5   |
| I51     | 1874915 | 5828700 | IT         | 2.95  | 0.52                  | 6700          | 2.7  | 3.8         | 95.7               | 0.4        | 1.7       | 12        | 1         | 120       | 380       | 116 ± 33  | 15 ± 2   |
| I52     | 1871810 | 5829542 | IT         | -0.25 | 0.26                  | 4500          | 2.7  | 8.9         | 89.7               | 1.4        | 4.3       | 20        | 1         | 200       | 450       | 123 ± 6   | 17 ± 2   |
| I53     | 1871371 | 5827820 | SS         | 0.91  | 0.33                  | 7500          | 3.1  | 9.5         | 88.9               | 1.6        | 2.1       | 17        | 1         | 170       | 590       | 258 ± 155 | 16 ± 4   |
| I54     | 1873409 | 5826958 | IT         | -1.05 | 0.17                  | 6000          | 3.4  | 10.9        | 87.6               | 1.5        | 3.4       | 24        | 1         | 120       | 350       | 130 ± 46  | 17 ± 3   |
| I55     | 1873681 | 5825837 | IT         | -0.95 | 0.07                  | 16000         | 3.0  | 12.6        | 87.0               | 0.3        | 4.3       | 21        | 1.1       | 180       | 590       | 136 ± 57  | 7 ± 1    |
| I56     | 1874059 | 5825206 | IT         | -1.24 | 0.05                  | 15000         | 3.3  | 12.5        | 87.5               | 0.1        | 4.3       | 35        | 1.3       | 130       | 520       | 251 ± 150 | 8 ± 2    |
| I57     | 1875042 | 5825703 | IT         | -1.20 | 0.06                  | 11000         | 3.2  | 6.4         | 93.5               | 0.1        | 2.0       | 13        | 1         | 150       | 460       | 83 ± 98   | 6 ± 1    |

| Site ID | NZTM E  | NZTM N  | Tidal zone | Depth | Average current speed | Chl- <i>a</i> | OM  | Mud         | Sand               | Gravel     | Pb        | Zn        | Cu        | TP        | TN        | N         | S        |
|---------|---------|---------|------------|-------|-----------------------|---------------|-----|-------------|--------------------|------------|-----------|-----------|-----------|-----------|-----------|-----------|----------|
|         |         |         |            | m     | m/s                   | µg/kg         | %   | %<br><63 µm | %<br>≥63µm<br><2mm | %<br>≥2 mm | mg/<br>kg | mg/<br>kg | mg/<br>kg | mg/<br>kg | mg/<br>kg | ind./core | no./core |
| I58     | 1876239 | 5827455 | IT         | -0.78 | 0.45                  | 8700          | 3.5 | 5.9         | 88.1               | 5.9        | 2.6       | 22        | 1         | 180       | 410       | 109 ± 46  | 16 ± 1   |
| I59     | 1877894 | 5826769 | IT         | -0.99 | 0.12                  | 4000          | 1.3 | 1.8         | 94.2               | 4.0        | 1.6       | 8         | 1         | 91        | 200       | 168 ± 41  | 20 ± 1   |
| I60     | 1878761 | 5826878 | DS         | 0.02  | 0.23                  | 3600          | 1.8 | 0.6         | 99.3               | 0.1        | 1.0       | 11        | 1         | 110       | 190       | 62 ± 26   | 8 ± 3    |
| I61     | 1879047 | 5826309 | IT         | -0.61 | 0.31                  | 8400          | 2.1 | 4.0         | 89.5               | 6.4        | 2.3       | 20        | 1         | 180       | 390       | 262 ± 31  | 14 ± 2   |
| I62     | 1877913 | 5824841 | IT         | -1.06 | 0.05                  | 6600          | 2.5 | 12.4        | 87.2               | 0.3        | 2.1       | 16        | 1         | 120       | 380       | 46 ± 12   | 8 ± 1    |
| I63     | 1878131 | 5824740 | IT         | -1.04 | 0.06                  | 7500          | 3.1 | 18.5        | 81.3               | 0.4        | 3.0       | 45        | 1.3       | 180       | 500       | 103 ± 88  | 11 ± 2   |
| I64     | 1878213 | 5824451 | IT         | -1.09 | 0.06                  | 11000         | 2.5 | 5.1         | 92.7               | 2.1        | 1.8       | 14        | 1         | 100       | 460       | 61 ± 24   | 10 ± 2   |
| I65     | 1880395 | 5824712 | IT         | -0.83 | 0.11                  | 5400          | 3.2 | 9.1         | 90.0               | 1.0        | 2.5       | 22        | 1.3       | 160       | 450       | 62 ± 22   | 13 ± 4   |
| I66     | 1881055 | 5825407 | IT         | -0.80 | 0.09                  | 4100          | 1.5 | 4.4         | 94.7               | 0.8        | 1.8       | 15        | 1         | 120       | 250       | 54 ± 23   | 16 ± 4   |
| I67     | 1882458 | 5824505 | IT         | -1.47 | 0.05                  | 2600          | 1.9 | 7.0         | 92.7               | 0.4        | 1.4       | 10        | 1         | 89        | 220       | 52 ± 9    | 13 ± 1   |
| I68     | 1879334 | 5822166 | IT         | -0.77 | 0.12                  | 9000          | 2.2 | 9.5         | 83.4               | 7.1        | 2.5       | 20        | 1.7       | 150       | 410       | 83 ± 34   | 13 ± 2   |
| I69     | 1878074 | 5820248 | IT         | -0.89 | 0.10                  | 8200          | 4.0 | 32.4        | 63.4               | 4.2        | 4.4       | 44        | 2.2       | 210       | 560       | 93 ± 15   | 7 ± 3    |
| I70     | 1878638 | 5820282 | IT         | -1.12 | 0.13                  | 10000         | 3.2 | 21.2        | 78.2               | 0.5        | 3.1       | 38        | 1.6       | 160       | 280       | 61 ± 52   | 9 ± 2    |
| I71     | 1881779 | 5821870 | IT         | 0.41  | 0.37                  | 11000         | 2.0 | 2.6         | 82.8               | 14.6       | 1.2       | 18        | 1         | 150       | 470       | 209 ± 73  | 14 ± 1   |
| I72     | 1883024 | 5821883 | IT         | -0.41 | 0.24                  | 9700          | 2.4 | 10.3        | 88.8               | 0.9        | 2.7       | 20        | 1.2       | 190       | 580       | 68 ± 21   | 15 ± 4   |
| I73     | 1883502 | 5821744 | IT         | -0.56 | 0.17                  | 9800          | 2.5 | 14.1        | 82.0               | 4.0        | 2.7       | 19        | 1.2       | 180       | 640       | 53 ± 22   | 11 ± 2   |

| Site ID | NZTM E  | NZTM N  | Tidal zone | Depth | Average current speed | Chl- <i>a</i> | OM  | Mud      | Sand         | Gravel  | Pb    | Zn    | Cu    | TP    | TN    | N         | S        |
|---------|---------|---------|------------|-------|-----------------------|---------------|-----|----------|--------------|---------|-------|-------|-------|-------|-------|-----------|----------|
|         |         |         |            | m     | m/s                   | µg/kg         | %   | % <63 µm | % ≥63µm <2mm | % ≥2 mm | mg/kg | mg/kg | mg/kg | mg/kg | mg/kg | ind./core | no./core |
| I74     | 1884604 | 5822782 | IT         | -0.94 | 0.04                  | 9100          | 1.8 | 3.5      | 96.3         | 0.3     | 1.2   | 10    | 1     | 93    | 180   | 77 ± 16   | 9 ± 2    |
| I75     | 1881669 | 5820495 | IT         | -0.86 | 0.18                  | 9100          | 2.8 | 12.2     | 86.9         | 0.9     | 2.7   | 28    | 1.5   | 180   | 280   | 74 ± 50   | 11 ± 5   |
| S1      | 1863119 | 5849891 | SS         | -0.81 | 0.31                  | 13000         | 1.4 | 2.9      | 92.4         | 4.6     | 1.7   | 10    | 0.4   | 98    | 499   | 84 ± 25   | 17 ± 2   |
| S2      | 1863324 | 5848985 | SS         | 5.02  | 0.20                  | 13000         | 2.2 | 3.3      | 96.3         | 0.2     | 1.9   | 9     | 0.4   | 150   | 499   | 65 ± 38   | 12 ± 4   |
| S3      | 1861965 | 5849197 | SS         | 1.64  | 0.32                  | 23200         | 1.9 | 2.6      | 96.0         | 1.3     | 1.6   | 8     | 0.4   | 152   | 499   | 63 ± 42   | 14 ± 3   |
| S4      | 1860615 | 5847444 | SS         | -0.25 | 0.66                  | 12400         | 1.9 | 2.9      | 87.6         | 9.3     | 1.7   | 8     | 0.6   | 87    | 499   | 49 ± 16   | 17 ± 2   |
| S5      | 1861538 | 5847070 | SS         | 0.83  | 0.30                  | 31800         | 4.2 | 6.2      | 93.7         | 0.1     | 2.2   | 12    | 0.8   | 167   | 500   | 133 ± 42  | 15 ± 3   |
| S6      | 1863438 | 5845776 | DS         | 8.12  | 0.71                  | 12900         | 1.4 | 2.9      | 84.5         | 12.6    | 1.8   | 8     | 0.4   | 109   | 499   | 24 ± 11   | 10 ± 3   |
| S7      | 1863971 | 5844105 | SS         | 4.22  | 0.45                  | 22100         | 1.5 | 2.7      | 93.9         | 3.3     | 2.0   | 8     | 0.4   | 119   | 499   | 57 ± 11   | 16 ± 1   |
| S8      | 1863208 | 5842925 | DS         | 3.09  | 0.35                  | 21000         | 1.8 | 3.3      | 94.4         | 2.4     | 2.0   | 10    | 0.5   | 118   | 499   | 39 ± 19   | 11 ± 3   |
| S9      | 1861889 | 5842056 | SS         | 0.29  | 0.33                  | 14800         | 2.0 | 8.0      | 91.3         | 0.8     | 2.0   | 10    | 0.7   | 114   | 499   | 135 ± 55  | 18 ± 2   |
| S10     | 1862749 | 5841987 | SS         | 1.39  | 0.32                  | 22700         | 3.2 | 14.7     | 83.9         | 1.5     | 2.4   | 12    | 0.8   | 141   | 700   | 85 ± 32   | 15 ± 2   |
| S11     | 1863916 | 5841646 | DS         | 2.93  | 0.32                  | 15900         | 1.8 | 4.1      | 89.0         | 6.9     | 2.0   | 9     | 0.5   | 110   | 499   | 22 ± 3    | 10 ± 1   |
| S12     | 1865267 | 5842276 | SS         | 1.31  | 0.32                  | 12600         | 1.8 | 5.1      | 94.2         | 0.8     | 1.7   | 9     | 0.5   | 79    | 499   | 242 ± 54  | 19 ± 2   |
| S13     | 1864312 | 5838107 | SS         | -0.18 | 0.37                  | 16300         | 3.3 | 12.6     | 86.9         | 0.5     | 2.7   | 13    | 1     | 132   | 600   | 525 ± 130 | 17 ± 2   |
| S14     | 1865477 | 5831782 | SS         | 0.47  | 0.21                  | 22300         | 3.2 | 6.2      | 93.4         | 0.4     | 3.2   | 17    | 1     | 153   | 499   | 158 ± 13  | 13 ± 2   |

| Site ID | NZTM E  | NZTM N  | Tidal zone | Depth | Average current speed | Chl- <i>a</i> | OM  | Mud         | Sand               | Gravel     | Pb        | Zn        | Cu        | TP        | TN        | N         | S        |
|---------|---------|---------|------------|-------|-----------------------|---------------|-----|-------------|--------------------|------------|-----------|-----------|-----------|-----------|-----------|-----------|----------|
|         |         |         |            | m     | m/s                   | µg/kg         | %   | %<br><63 µm | %<br>≥63µm<br><2mm | %<br>≥2 mm | mg/<br>kg | mg/<br>kg | mg/<br>kg | mg/<br>kg | mg/<br>kg | ind./core | no./core |
| S15     | 1867728 | 5831371 | SS         | 1.29  | 0.22                  | 16500         | 3.3 | 11.3        | 85.9               | 2.8        | 3.2       | 19        | 0.9       | 154       | 499       | 151 ± 58  | 14 ± 2   |
| S17     | 1870415 | 5831000 | DS         | 3.10  | 0.50                  | 56300         | 2.1 | 5.0         | 86.7               | 8.3        | 2.8       | 19        | 0.6       | 115       | 499       | 94 ± 72   | 10 ± 0   |
| S18     | 1869343 | 5830086 | SS         | 0.81  | 0.43                  | 15600         | 2.7 | 10.8        | 87.9               | 1.2        | 2.9       | 20        | 1         | 117       | 499       | 167 ± 16  | 18 ± 1   |
| S19     | 1869104 | 5828958 | SS         | 0.96  | 0.27                  | 17600         | 3.9 | 18.7        | 78.4               | 2.9        | 3.6       | 24        | 1.4       | 175       | 600       | 483 ± 102 | 18 ± 5   |
| S20     | 1868665 | 5827445 | SS         | 0.21  | 0.31                  | 19200         | 6.2 | 22.9        | 67.4               | 9.8        | 6.4       | 28        | 3.3       | 340       | 1200      | 484 ± 101 | 15 ± 1   |
| S21     | 1870527 | 5830195 | SS         | 2.67  | 0.27                  | 19100         | 3.1 | 11.9        | 86.0               | 2.0        | 3.2       | 19        | 1.2       | 143       | 499       | 367 ± 128 | 15 ± 3   |
| S22     | 1869904 | 5828906 | SS         | 3.32  | 0.35                  | 14000         | 2.8 | 9.2         | 87.9               | 2.8        | 3.2       | 20        | 0.9       | 147       | 499       | 323 ± 131 | 20 ± 1   |
| S23     | 1869999 | 5828115 | SS         | 3.13  | 0.27                  | 8100          | 3.6 | 7.9         | 89.8               | 2.2        | 3.3       | 17        | 0.8       | 100       | 499       | 429 ± 312 | 18 ± 3   |
| S24     | 1870693 | 5828013 | SS         | 3.49  | 0.34                  | 12400         | 4.7 | 23.4        | 73.4               | 3.2        | 4.6       | 28        | 1.9       | 189       | 700       | 188 ± 77  | 20 ± 5   |
| S25     | 1872057 | 5830430 | DS         | 3.56  | 0.57                  | 39400         | 1.7 | 3.4         | 96.1               | 0.5        | 2.0       | 9         | 0.5       | 114       | 499       | 94 ± 29   | 8 ± 4    |
| S26     | 1872819 | 5828436 | SS         | 4.44  | 0.28                  | 8400          | 3.3 | 7.9         | 91.6               | 0.5        | 3.7       | 22        | 1         | 187       | 499       | 232 ± 148 | 22 ± 6   |
| S27     | 1873732 | 5830110 | SS         | 2.51  | 0.38                  | 32800         | 1.8 | 5.1         | 90.8               | 4.2        | 3.3       | 20        | 0.8       | 111       | 499       | 169 ± 44  | 20 ± 2   |
| S28     | 1874368 | 5829059 | SS         | 1.87  | 0.50                  | 10200         | 2.7 | 7.0         | 80.2               | 12.8       | 3.3       | 16        | 0.8       | 180       | 500       | 64 ± 24   | 14 ± 2   |
| S29     | 1874058 | 5832821 | SS         | -0.65 | 0.33                  | 19100         | 1.8 | 6.2         | 91.5               | 2.4        | 2.2       | 11        | 0.7       | 115       | 500       | 695 ± 279 | 17 ± 2   |
| S30     | 1875880 | 5830399 | DS         | -0.16 | 0.63                  | 34700         | 1.3 | 3.0         | 97.0               | 0.1        | 1.7       | 8         | 0.4       | 136       | 499       | 118 ± 125 | 9 ± 4    |
| S31     | 1876229 | 5829192 | DS         | 9.00  | 0.52                  | 2000          | 1.0 | 2.6         | 85.0               | 12.5       | 2.1       | 14        | 0.5       | 81        | 499       | 33 ± 8    | 10 ± 3   |

| Site ID | NZTM E  | NZTM N  | Tidal zone | Depth | Average current speed | Chl- <i>a</i> | OM  | Mud      | Sand          | Gravel  | Pb    | Zn    | Cu    | TP    | TN    | N         | S        |
|---------|---------|---------|------------|-------|-----------------------|---------------|-----|----------|---------------|---------|-------|-------|-------|-------|-------|-----------|----------|
|         |         |         |            | m     | m/s                   | µg/kg         | %   | % <63 µm | % ≥63 µm <2mm | % ≥2 mm | mg/kg | mg/kg | mg/kg | mg/kg | mg/kg | ind./core | no./core |
| S32     | 1876881 | 5828367 | SS         | 2.39  | 0.67                  | 22800         | 2.4 | 5.3      | 89.9          | 5.0     | 2.4   | 14    | 0.9   | 182   | 500   | 131 ± 43  | 16 ± 1   |
| S33     | 1878625 | 5828901 | DS         | 4.91  | 0.67                  | 2200          | 1.1 | 2.4      | 93.3          | 4.3     | 1.4   | 8     | 0.3   | 111   | 499   | 86 ± 21   | 8 ± 1    |
| S34     | 1875108 | 5827203 | SS         | -0.27 | 0.37                  | 22900         | 2.1 | 5.5      | 91.5          | 3.0     | 1.7   | 10    | 0.6   | 104   | 499   | 744 ± 654 | 15 ± 2   |
| S35     | 1878151 | 5827359 | SS         | 3.21  | 0.33                  | 9100          | 1.3 | 3.3      | 90.8          | 5.9     | 2.1   | 12    | 0.6   | 134   | 499   | 66 ± 6    | 18 ± 1   |
| S36     | 1879150 | 5827089 | SS         | 1.41  | 0.02                  | 7200          | 2.2 | 5.6      | 81.8          | 12.7    | 2.6   | 15    | 0.9   | 85    | 499   | 141 ± 28  | 15 ± 1   |
| S37     | 1879087 | 5825602 | SS         | 0.15  | 0.18                  | 19500         | 1.9 | 3.8      | 85.7          | 10.4    | 2.8   | 19    | 0.8   | 91    | 499   | 244 ± 215 | 17 ± 4   |
| S38     | 1880201 | 5825764 | SS         | 2.84  | 0.16                  | 14700         | 2.9 | 9.4      | 89.9          | 0.7     | 3.5   | 20    | 2.1   | 182   | 499   | 214 ± 127 | 16 ± 3   |
| S39     | 1879878 | 5824854 | DS         | 2.73  | 0.68                  | 15200         | 2.4 | 4.2      | 78.0          | 17.8    | 3.2   | 22    | 0.8   | 108   | 499   | 183 ± 96  | 6 ± 1    |
| S40     | 1880318 | 5822864 | DS         | 1.43  | 0.45                  | 10400         | 1.7 | 3.2      | 87.5          | 9.4     | 3.8   | 25    | 1     | 117   | 499   | 28 ± 7    | 7 ± 1    |
| S41     | 1878919 | 5820940 | SS         | -0.53 | 0.46                  | 41300         | 2.9 | 5.0      | 80.1          | 15.0    | 3.0   | 18    | 1.4   | 152   | 499   | 218 ± 43  | 17 ± 4   |
| S42     | 1880085 | 5821093 | SS         | -0.99 | 0.53                  | 14100         | 2.0 | 4.9      | 88.9          | 6.2     | 2.1   | 28    | 1.1   | 117   | 499   | 485 ± 176 | 18 ± 4   |
| S43     | 1881102 | 5821482 | SS         | -0.53 | 0.29                  | 11200         | 3.0 | 14.7     | 78.5          | 6.9     | 6.4   | 37    | 3.5   | 183   | 500   | 196 ± 77  | 13 ± 3   |
| S44     | 1881346 | 5821885 | SS         | 0.82  | 0.36                  | 13000         | 2.6 | 8.0      | 79.6          | 12.4    | 5.5   | 31    | 2.2   | 177   | 499   | 244 ± 215 | 17 ± 4   |
| S45     | 1882682 | 5822747 | SS         | -0.29 | 0.24                  | 14000         | 2.9 | 12.3     | 80.8          | 7.0     | 4.2   | 27    | 2.7   | 250   | 600   | 303 ± 124 | 16 ± 2   |

Abbreviations, Chl-*a* chlorophyll *a*, OM organic content, grain size fractions mud, sand and gravel, metals Pb lead, Zn zinc, Cu copper, TP total phosphorous, TN total nitrogen, N average abundance ±SD, S average number of taxa ±SD.



Supplementary Table S2. Summary of measured environmental variables, analysis methods and units.

| Variable              | Measurement extraction method                                                    | Unit               |
|-----------------------|----------------------------------------------------------------------------------|--------------------|
| TN                    | Catalytic combustion, separation, thermal conductivity detector.                 | mg/kg (dry weight) |
| TP                    | Hydrochloric/nitric acid digestion, ICP-MS.                                      | mg/kg (dry weight) |
| Chl- <i>a</i>         | Extraction with 95% ethanol, spectroscopy. (NIWA Periphyton Monitoring Manual).  | µg/kg              |
| Metals (Cu, Pb, Zn)   | Hydrochloric/nitric acid digestion, ICP-MS.                                      | mg/kg (dry weight) |
| OM                    | Dry sediment weight loss after combustion at 550°C.                              | g/100 g            |
| Mud                   | Grain size < 63 µm                                                               | g/100 g            |
| Sand                  | Grain size ≥ 63 µm, < 2 mm.                                                      | g/100 g            |
| Gravel                | Grain size ≥ 2mm                                                                 | g/100 g            |
| Average current speed | Estimated from Estuary Transport Module (Knight, 2019)                           | m/s                |
| Depth                 | Elevation model grid corrected to chart datum (CD) (de Ruiter et al. 2019 [56]). | m                  |

TN; total nitrogen, TP; total phosphorous, Chl-*a*; Chlorophyll-*a*, Cu; copper, Pb; lead, Zn; zinc, OM; organic content.

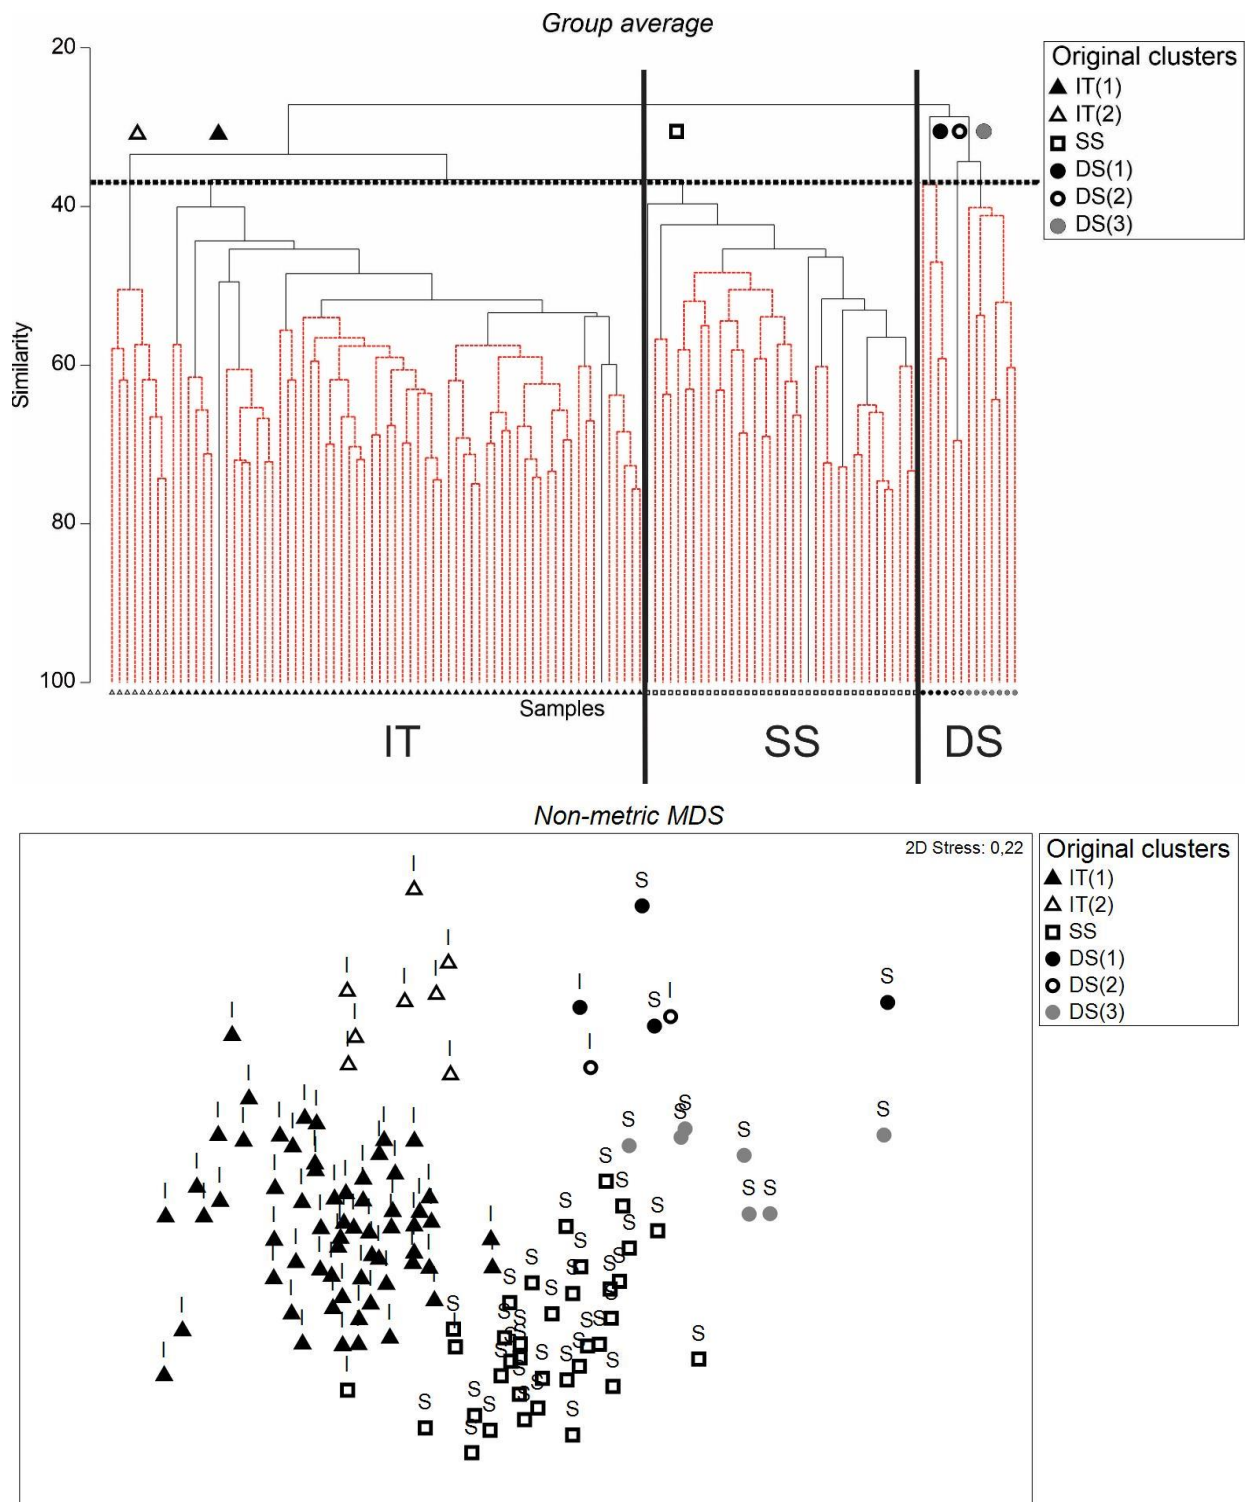

Supplementary Figure S1. Hierarchical cluster analysis with SIMPROF test (red lines indicate non-significant differences) based on the entire taxa abundance data set (square-root transformed, Bray-Curtis similarity) were used to examine the spatial distribution of macrofauna communities, and based on the clusters together with site characteristics, groups were established to represent tidal zones. The black dashed line illustrates the 37% similarity level where six clusters were separated, which are visualised in the non-metric multidimensional scaling (nMDS) plot. The open triangle cluster IT(2) were very shallow and muddy intertidal sites located high up in the estuary and therefore combined with the intertidal cluster (IT(1); black triangles). The shallow subtidal zone is represented by the cluster SS (open squares) and the three other clusters DS(1) DS(2), and DS(3) (black, open, and grey circles) were combined based on site characteristics (e.g. depth, mud content, current speed) and their location in the main channels of the harbour, to represent the deep subtidal zone (DS). Please see Table 2 for site characteristics, and Figure 1 for locations. 'I' and 'S' above symbols indicate within which survey the sites have been sampled, I; intertidal survey 2011-2012, S; subtidal survey 2016.

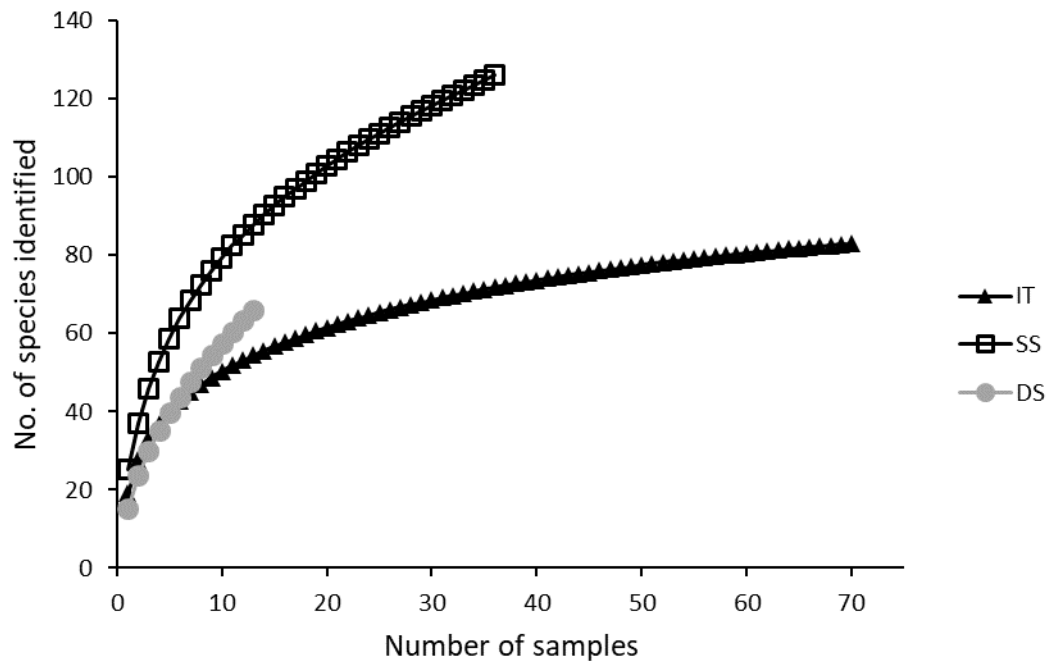

Supplementary Figure S2. Species accumulation curves (SAC) for intertidal (IT; black triangles,  $n = 70$ ), shallow subtidal (SS; open squares,  $n = 36$ ) and deep subtidal (DS; grey circles,  $n = 13$ ) sampling sites. To best account for the heterogeneous nature of estuarine communities, SACs were produced using the Ugland, Gray and Ellingsen (UGE) distribution.

Supplementary Table S3. Similarity percentage (SIMPER) analysis results tables summarising key taxa contributing to the dissimilarities observed between a) IT and SS, b) IT and DS, and c) SS and DS macroinvertebrate communities based on square-root transformed macroinvertebrate abundance data. Overall dissimilarity between IT and SS was 66%, IT and DS was 77%, and SS and DS was 72%. Differences between tidal groups are shown to a 40% level. Av. N = average abundance (per core), Av. Diss = average dissimilarity, Diss/SD = ratio of average contribution divided by standard deviation, Contrib. % = contribution percentage, Cum. % = cumulative contribution percentage.

| a) Taxa                        | IT<br>Av. N | SS<br>Av. N | Av. Diss | Diss/SD | Contrib. % | Cum. % |
|--------------------------------|-------------|-------------|----------|---------|------------|--------|
| Amphipoda                      | 4.00        | 4.33        | 4.53     | 0.93    | 6.86       | 6.86   |
| Spionidae                      | 3.80        | 5.97        | 4.53     | 1.16    | 6.86       | 13.73  |
| <i>Aricidea</i> sp.            | 0.62        | 3.71        | 4.18     | 1.24    | 6.34       | 20.06  |
| Oligochaeta                    | 2.11        | 4.34        | 3.67     | 0.90    | 5.57       | 25.63  |
| <i>Heteromastus filiformis</i> | 2.77        | 3.84        | 3.23     | 1.26    | 4.90       | 30.53  |
| Syllidae                       | 0.95        | 3.01        | 3.11     | 1.25    | 4.71       | 35.24  |
| Paraonidae                     | 0.28        | 2.57        | 2.90     | 1.43    | 4.39       | 39.64  |
| <i>Linucula hartvigiana</i>    | 1.98        | 0.68        | 2.16     | 1.12    | 3.28       | 42.92  |
| b) Taxa                        | IT<br>Av. N | DS<br>Av. N | Av. Diss | Diss/SD | Contrib. % | Cum. % |
| Spionidae                      | 3.80        | 0.69        | 5.81     | 1.73    | 7.51       | 7.51   |
| Amphipoda                      | 4.00        | 2.87        | 5.64     | 0.96    | 7.29       | 14.80  |
| <i>Paphies australis</i>       | 0.08        | 2.43        | 4.50     | 0.62    | 5.82       | 20.61  |
| <i>Heteromastus filiformis</i> | 2.77        | 0.76        | 4.21     | 1.13    | 5.44       | 26.06  |
| <i>Linucula hartvigiana</i>    | 1.98        | 0.00        | 3.35     | 1.12    | 4.33       | 30.39  |
| Hesionidae                     | 0.01        | 1.73        | 3.25     | 0.91    | 4.21       | 34.60  |
| <i>Austrovenus stutchburyi</i> | 1.92        | 0.04        | 3.08     | 1.05    | 3.99       | 38.58  |
| Oligochaeta                    | 2.11        | 0.94        | 2.92     | 1.00    | 3.78       | 42.36  |
| c) Taxa                        | SS<br>Av. N | DS<br>Av. N | Av. Diss | Diss/SD | Contrib. % | Cum. % |
| Spionidae                      | 5.97        | 0.69        | 7.17     | 1.38    | 10.00      | 10.00  |
| Oligochaeta                    | 4.34        | 0.94        | 4.77     | 1.04    | 6.65       | 16.66  |
| <i>Aricidea</i> sp.            | 3.71        | 0.39        | 4.70     | 1.24    | 6.56       | 23.22  |
| <i>Heteromastus filiformis</i> | 3.84        | 0.76        | 4.50     | 1.48    | 6.28       | 29.50  |
| Amphipoda                      | 4.33        | 2.87        | 4.37     | 0.90    | 6.09       | 35.59  |
| <i>Paphies australis</i>       | 0.63        | 2.43        | 3.75     | 0.71    | 5.23       | 40.82  |

Supplementary Table S4. Summary of one-way PERMANOVA comparing functional group abundance data (square-root transformed data, Bray-Curtis similarity matrix) between tidal zones (Intertidal, IT; Shallow subtidal, SS; Deep subtidal, DS).

| Source     | df  | SS                     | MS     | Pseudo-F | P(perm) | Post-hoc pairwise tests |
|------------|-----|------------------------|--------|----------|---------|-------------------------|
| Tidal zone | 2   | 29031                  | 14515  | 15.093   | <0.001  | I ≠ SS ≠ SD             |
| Residuals  | 116 | 1.1156×10 <sup>5</sup> | 961.71 |          |         |                         |
| Total      | 118 | 1.4059×10 <sup>5</sup> |        |          |         |                         |

Supplementary Table S5. Similarity percentage (SIMPER) analysis results table summarising key functional groups (FG) contributing to the dissimilarities observed between a) IT and SS, b) IT and DS, and c) SS and DS macroinvertebrate communities based on square-root transformed functional group abundance data.

Overall dissimilarity between IT and SS was 51%, IT and DS was 58%, and SS and DS was 56%.

Differences between tidal groups are shown to a 70% level. Av. N = average abundance (per core), Av. Diss = average dissimilarity, Diss/SD = ratio of average contribution divided by standard deviation, Contrib. % = contribution percentage, Cum. % = cumulative contribution percentage. For corresponding functional group attributes see Table 1.

| a) Functional group | IT<br>Av. N | SS<br>Av. N | Av. Diss | Diss/SD | Contrib. % | Cum. % |
|---------------------|-------------|-------------|----------|---------|------------|--------|
| FG 13               | 3.15        | 6.67        | 6.24     | 1.42    | 12.13      | 12.13  |
| FG 22               | 4.01        | 4.33        | 5.47     | 0.95    | 10.63      | 22.76  |
| FG 12               | 3.95        | 6.05        | 5.41     | 1.17    | 10.51      | 33.27  |
| FG 17               | 1.21        | 4.36        | 5.10     | 1.61    | 9.91       | 43.18  |
| FG 19               | 2.12        | 4.45        | 4.51     | 0.95    | 8.78       | 51.96  |
| FG 2                | 1.94        | 1.09        | 2.73     | 1.13    | 5.31       | 57.26  |
| FG 6                | 2.09        | 0.74        | 2.72     | 1.15    | 5.30       | 62.56  |
| FG 23               | 1.49        | 2.41        | 2.42     | 0.99    | 4.70       | 67.26  |
| FG 5                | 1.62        | 0.51        | 1.97     | 1.31    | 3.82       | 71.08  |
| b) Functional group | IT<br>Av. N | DS<br>Av. N | Av. Diss | Diss/SD | Contrib. % | Cum. % |
| FG 12               | 3.95        | 0.87        | 6.77     | 1.67    | 11.70      | 11.70  |
| FG 22               | 4.01        | 2.91        | 6.46     | 0.99    | 11.16      | 22.86  |
| FG 2                | 1.94        | 2.52        | 6.26     | 0.93    | 10.82      | 33.68  |
| FG 13               | 3.15        | 3.03        | 4.77     | 1.32    | 8.25       | 41.92  |
| FG 19               | 2.12        | 2.19        | 4.19     | 1.20    | 7.24       | 49.17  |
| FG 6                | 2.09        | 0.04        | 4.16     | 1.18    | 7.20       | 56.37  |
| FG 17               | 1.21        | 1.84        | 3.24     | 1.23    | 5.61       | 61.98  |
| FG 8                | 1.51        | 0.09        | 3.13     | 1.91    | 5.41       | 67.38  |
| FG 5                | 1.62        | 0.20        | 3.11     | 1.44    | 5.37       | 72.76  |
| c) Functional group | SS<br>Av. N | DS<br>Av. N | Av. Diss | Diss/SD | Contrib. % | Cum. % |
| FG 12               | 6.05        | 0.87        | 8.67     | 1.39    | 15.54      | 15.54  |
| FG 13               | 6.67        | 3.03        | 6.85     | 1.49    | 12.28      | 27.83  |
| FG 22               | 4.33        | 2.91        | 5.36     | 0.92    | 9.62       | 37.44  |
| FG 19               | 4.45        | 2.19        | 5.29     | 1.02    | 9.49       | 46.94  |
| FG 2                | 1.09        | 2.52        | 4.81     | 0.80    | 8.64       | 55.57  |
| FG 17               | 4.36        | 1.84        | 4.79     | 1.54    | 8.60       | 64.17  |
| FG 23               | 2.41        | 0.85        | 2.94     | 1.01    | 5.28       | 69.45  |
| FG 20               | 1.09        | 0.13        | 1.85     | 0.98    | 3.33       | 72.78  |
